# Supplementary material
Source: PubMed Central journal article supplement (PMC2668138)
Supplement: NIHMS97822-supplement-Jacksontable1.pdf [file NIHMS97822-supplement-Jacksontable1.pdf]

Rhabdoid

|    | A        | B        | C  | D            | E                   |
|----|----------|----------|----|--------------|---------------------|
| 1  | T-number | Location | C  | Arm          | Abnormality         |
| 2  | T-00-315 | thigh    | 1  | p21.2        | duplication         |
| 3  |          |          | 2  | p25.3        | duplication         |
| 4  |          |          | 6  | q14.1        | deletion            |
| 5  |          |          | 7  | p15.1-15.2   | deletion            |
| 6  |          |          | 7  | q21.1        | deletion            |
| 7  |          |          | 9  | p24.1        | deletion            |
| 8  |          |          | 14 | q13.1        | deletion            |
| 9  |          |          | 15 | q14          | deletion            |
| 10 |          |          | 22 | q11.21-12.1  | deletion            |
| 11 |          |          | 22 | q11.22-11.23 | homozygous deletion |
| 12 |          |          |    |              |                     |
| 13 | T01-134  | renal    | 3  | p24.3        | duplication         |
| 14 |          |          | 3  | q27.3-28     | deletion            |
| 15 |          |          | 22 | q11.21       | deletion            |
| 16 |          |          | 22 | q11.22       | deletion            |
| 17 |          |          | 22 | q11.22-11.23 | homozygous deletion |
| 18 |          |          | 22 | q12.1-12.2   | deletion            |
| 19 |          |          | X  | p22.3        | duplication         |
| 20 |          |          |    |              |                     |
| 21 | T01-146  | renal    | 2  | p22.1        | deletion            |
| 22 |          |          | 3  | p21.31       | deletion            |
| 23 |          |          | 3  | p21.31       | deletion            |
| 24 |          |          | 3  | p21.31-21.1  | deletion            |
| 25 |          |          | 3  | p14.3        | deletion            |
| 26 |          |          | 3  | p12.2        | deletion            |
| 27 |          |          | 3  | p12.2        | duplication         |
| 28 |          |          | 3  | p12.2        | deletion            |
| 29 |          |          | 3  | p12.2-12.1   | duplication         |
| 30 |          |          | 3  | p12.1        | deletion            |
| 31 |          |          | 6  | q12          | deletion            |
| 32 |          |          | 6  | q24.3        | deletion            |
| 33 |          |          | 9  | p24.1        | duplication         |
| 34 |          |          | 13 | q33.3        | deletion            |
| 35 |          |          | 14 | q21.1        | deletion            |
| 36 |          |          | 18 | q22.2        | deletion            |
| 37 |          |          | 22 | q11.1-11.2   | deletion            |
| 38 |          |          | 22 | q11.22-11.23 | homozygous deletion |
| 39 |          |          | 22 | q11.23-12.2  | deletion            |
| 40 |          |          | 22 | q12.2-13.2   | duplication         |
| 41 |          |          | 22 | q13.2-END    | deletion            |
| 42 |          |          |    |              |                     |
| 43 | T-01-175 | brain    | 6  | q26          | duplication         |
| 44 |          |          | 12 | q23.1        | deletion            |
| 45 |          |          | 14 | q11.2        | duplication         |
| 46 |          |          | 14 | WHOLE        | duplication         |
| 47 |          |          | 16 | q22.1        | CN LOH              |
| 48 |          |          | 22 | q arm        | deletion            |
| 49 |          |          |    |              |                     |
| 50 | T01-177  | brain    | 8  | p11.21       | deletion            |
| 51 |          |          | 11 | q11          | homozygous deletion |
| 52 |          |          | 16 | q23.3        | deletion            |
| 53 |          |          | 22 | q11.21-END   | CN LOH              |
| 54 |          |          |    |              |                     |
| 55 | T-01-205 | brain    | 2  | q33.1        | duplication         |
| 56 |          |          | 22 | q arm        | deletion            |
| 57 |          |          | 22 | q11.23       | homozygous deletion |
| 58 |          |          |    |              |                     |
| 59 | T-01-323 | brain    | 1  | WHOLE        | duplication         |
| 60 |          |          | 4  | q21.1        | deletion            |
| 61 |          |          | 9  | p22.1        | duplication         |
| 62 |          |          | 12 | WHOLE        | duplication         |
| 63 |          |          | 22 | q arm        | CN LOH              |
| 64 |          |          | X  | q arm        | duplication         |
| 65 |          |          |    |              |                     |
| 66 | T01-90   | brain    | 2  | q33.3        | deletion            |
| 67 |          |          | 22 | q arm        | deletion            |
| 68 |          |          |    |              |                     |
| 69 | T-02-07  | brain    | 3  | p26.1        | deletion            |
| 70 |          |          | 10 | q21.3        | deletion            |
| 71 |          |          | 19 | p13.11-13.2  | deletion            |
| 72 |          |          | 22 | q11.1-11.21  | duplication         |
| 73 |          |          | 22 | q11.21-END   | deletion            |
| 74 |          |          |    |              |                     |
| 75 | T-02-157 | renal    | 3  | p26.3        | deletion            |
| 76 |          |          | 3  | q26.1        | deletion            |

Rhabdoid

|     | A        | B           | C  | D            | E                   |
|-----|----------|-------------|----|--------------|---------------------|
| 1   | T-number | Location    | C  | Arm          | Abnormality         |
| 77  |          |             | 4  | q32.1        | deletion            |
| 78  |          |             | 6  | q14.1        | deletion            |
| 79  |          |             | 9  | p23          | deletion            |
| 80  |          |             | 10 | q11.22       | duplication         |
| 81  |          |             | 19 | q13.31       | deletion            |
| 82  |          |             | 22 | q11.21       | duplication         |
| 83  |          |             | 22 | q11.23       | homozygous deletion |
| 84  |          |             |    |              |                     |
| 85  | T-02-203 | brain       | 1  | q42.2        | duplication         |
| 86  |          |             | 2  | p25.3- p22.3 | deletion            |
| 87  |          |             | 6  | q27          | duplication         |
| 88  |          |             | 22 | q arm        | deletion            |
| 89  |          |             |    |              |                     |
| 90  | T-02-215 | spinal cord | 3  | p24.2        | deletion            |
| 91  |          |             | 7  | q34          | deletion            |
| 92  |          |             | 7  | q35          | deletion            |
| 93  |          |             | 8  | p23.2        | deletion            |
| 94  |          |             | 8  | p22          | deletion            |
| 95  |          |             | 8  | p22          | deletion            |
| 96  |          |             | 11 | q14.1        | deletion            |
| 97  |          |             | 19 | p12          | deletion            |
| 98  |          |             | 22 | q11.1        | duplication         |
| 99  |          |             | 22 | q11.21-END   | CN LOH              |
| 100 |          |             |    |              |                     |
| 101 | T02-216  | renal       | 2  | p14          | duplication         |
| 102 |          |             | 3  | q13.31       | deletion            |
| 103 |          |             | 22 | q11.23       | homozygous deletion |
| 104 |          |             | 22 | q arm        | CN LOH              |
| 105 |          |             |    |              |                     |
| 106 | T-02-237 | brain       | 6  | q13-q25.2    | deletion            |
| 107 |          |             | 22 | q arm        | deletion            |
| 108 |          |             | 22 | q11.23       | duplication         |
| 109 |          |             |    |              |                     |
| 110 | T-02-291 | brain       | 3  | p14.1        | deletion            |
| 111 |          |             | 6  | q14.1        | deletion            |
| 112 |          |             | 7  | q34          | homozygous deletion |
| 113 |          |             | 9  | q21.31-22.2  | CN LOH              |
| 114 |          |             | 11 | q11          | deletion            |
| 115 |          |             | 12 | p11.21       | duplication         |
| 116 |          |             | 18 | q22.2        | deletion            |
| 117 |          |             | 22 | q11.21-END   | CN LOH              |
| 118 |          |             |    |              |                     |
| 119 | T-02-40  | brain       | 12 | q21.31-21.32 | duplication         |
| 120 |          |             | 22 | q11.1-11.23  | deletion            |
| 121 |          |             | 22 | q11.23       | homozygous deletion |
| 122 |          |             | 22 | q11.23       | duplication         |
| 123 |          |             |    |              |                     |
| 124 | T-02-79  | brain       | 2  | p11.2        | deletion            |
| 125 |          |             | 3  | p26.1        | deletion            |
| 126 |          |             | 3  | q26.1        | deletion            |
| 127 |          |             | 6  | q22.31       | duplication         |
| 128 |          |             | 7  | q21.11       | deletion            |
| 129 |          |             | 9  | p24.1        | deletion            |
| 130 |          |             | 9  | p21.1        | deletion            |
| 131 |          |             | 11 | q14.1        | deletion            |
| 132 |          |             | 11 | q14.1        | deletion            |
| 133 |          |             | 14 | q21.2        | deletion            |
| 134 |          |             | 16 | q23.1        | deletion            |
| 135 |          |             | 18 | q21.2        | deletion            |
| 136 |          |             | 22 | q11.21-END   | CN LOH              |
| 137 |          |             |    |              |                     |
| 138 | T03-128B | brain       | 22 | q arm        | deletion            |
| 139 |          |             |    |              |                     |
| 140 | T-03-151 | brain       | 1  | p21.1        | deletion            |
| 141 |          |             | 3  | p14.1        | deletion            |
| 142 |          |             | 12 | p11.21       | duplication         |
| 143 |          |             | 22 | q11.21-END   | CN LOH              |
| 144 |          |             |    |              |                     |
| 145 | T03-152  | brain       | 14 | q31.3        | deletion            |
| 146 |          |             | 22 | q11.23-END   | CN LOH              |
| 147 |          |             |    |              |                     |
| 148 | T-03-282 | brain       | 3  | q13.31       | deletion            |
| 149 |          |             | 3  | q26.1        | deletion            |
| 150 |          |             | 4  | q13.1-13.2   | CN LOH              |
| 151 |          |             | 5  | q11.2        | deletion            |

Rhabdoid

|     | A        | B        | C  | D            | E                   |
|-----|----------|----------|----|--------------|---------------------|
| 1   | T-number | Location | C  | Arm          | Abnormality         |
| 152 |          |          | 5  | q23.1        | duplication         |
| 153 |          |          | 5  | q34          | deletion            |
| 154 |          |          | 6  | q14.1        | deletion            |
| 155 |          |          | 7  | p15.3        | duplication         |
| 156 |          |          | 12 | p11.21       | duplication         |
| 157 |          |          | 12 | q23.1        | deletion            |
| 158 |          |          | 15 | q14          | deletion            |
| 159 |          |          | 19 | q12-q13.11   | deletion            |
| 160 |          |          | 22 | q11.21-12.3  | deletion            |
| 161 |          |          | 22 | q11.23       | homozygous deletion |
| 162 |          |          |    |              |                     |
| 163 | T-03-287 | brain    | 2  | q37.3        | deletion            |
| 164 |          |          | 6  | q14.1        | deletion            |
| 165 |          |          | 8  | p22          | deletion            |
| 166 |          |          | 22 | q11.1-END    | CN LOH              |
| 167 |          |          |    |              |                     |
| 168 | T-03-39  | facial   | 2  | p22.1        | deletion            |
| 169 |          |          | 3  | p11.1        | deletion            |
| 170 |          |          | 6  | q14.1        | homozygous deletion |
| 171 |          |          | 8  | p23.2        | deletion            |
| 172 |          |          | 15 | q14          | deletion            |
| 173 |          |          | 19 | q13.32       | deletion            |
| 174 |          |          | 20 | q12          | deletion            |
| 175 |          |          | 22 | q11.21-11.23 | deletion            |
| 176 |          |          | 22 | q11.23       | homozygous deletion |
| 177 |          |          |    |              |                     |
| 178 | T-03-68  | neck     | 1  | p35.3        | duplication         |
| 179 |          |          | 13 | q31.1        | deletion            |
| 180 |          |          | 15 | q25.3        | deletion            |
| 181 |          |          | 16 | p13.3        | deletion            |
| 182 |          |          | 17 | p11.2        | deletion            |
| 183 |          |          | 17 | q25.3        | duplication         |
| 184 |          |          | 18 | p11.22-11.23 | deletion            |
| 185 |          |          | 22 | q11.22-11.23 | homozygous deletion |
| 186 |          |          | 22 | q13.31-13.33 | deletion            |
| 187 |          |          |    |              |                     |
| 188 | T-04-07  | renal    | 7  | q35          | deletion            |
| 189 |          |          | 22 | q11.21-END   | CN LOH              |
| 190 |          |          |    |              |                     |
| 191 | T04-09   | brain    | 5  | q34          | deletion            |
| 192 |          |          | 7  | q11.21       | deletion            |
| 193 |          |          | 22 | q arm        | deletion            |
| 194 |          |          |    |              |                     |
| 195 | T-04-124 | brain    | 15 | q13.3        | duplication         |
| 196 |          |          | 22 | q arm        | deletion            |
| 197 |          |          | 22 | q11.23       | homozygous deletion |
| 198 |          |          |    |              |                     |
| 199 | T-04-211 | brain    | 3  | q26.1        | deletion            |
| 200 |          |          | 3  | q26.31       | deletion            |
| 201 |          |          | 3  | q11.2-q24    | deletion            |
| 202 |          |          | 5  | q34          | deletion            |
| 203 |          |          | 10 | q26.13-END   | deletion            |
| 204 |          |          | 11 | q14.1        | deletion            |
| 205 |          |          | 20 | p12.1        | deletion            |
| 206 |          |          | 22 | q11.21       | duplication         |
| 207 |          |          | 22 | q11.22-END   | deletion            |
| 208 |          |          | 22 | q11.22-11.23 | homozygous deletion |
| 209 |          |          |    |              |                     |
| 210 | T04-23   | renal    | 3  | q25.1        | homozygous deletion |
| 211 |          |          | 7  | q35          | deletion            |
| 212 |          |          | 22 | q11.22-12.1  | deletion            |
| 213 |          |          | 22 | q13.2        | deletion            |
| 214 |          |          |    |              |                     |
| 215 | T-04-53  | brain    | 5  | p15.31       | deletion            |
| 216 |          |          | 5  | q34          | deletion            |
| 217 |          |          | 6  | q14.1        | deletion            |
| 218 |          |          | 9  | p23          | deletion            |
| 219 |          |          | 17 | q25.3        | duplication         |
| 220 |          |          | 22 | q12.1        | deletion            |
| 221 |          |          |    |              |                     |
| 222 | T05-173  | brain    | 1  | BEGIN-p36.11 | deletion            |
| 223 |          |          | 5  | q15          | duplication         |
| 224 |          |          | 6  | BEGIN-p22.3  | deletion            |
| 225 |          |          | 6  | q14.1        | deletion            |
| 226 |          |          | 10 | q26.3        | duplication         |

Rhabdoid

|     | A         | B           | C  | D            | E                   |
|-----|-----------|-------------|----|--------------|---------------------|
| 1   | T-number  | Location    | C  | Arm          | Abnormality         |
| 227 |           |             | 15 | q12-END      | deletion            |
| 228 |           |             | 16 | q23.1        | deletion            |
| 229 |           |             | 22 | q11.1-11.21  | deletion            |
| 230 |           |             | 22 | q11.21-11.22 | duplication         |
| 231 |           |             | 22 | q11.22-11.23 | homozygous deletion |
| 232 |           |             | 22 | q11.23       | duplication         |
| 233 |           |             | 22 | q11.23-12.1  | deletion            |
| 234 |           |             | 22 | q12.1        | homozygous deletion |
| 235 |           |             | 22 | q12.1-END    | deletion            |
| 236 |           |             | 22 | q12.3        | duplication         |
| 237 |           |             |    |              |                     |
| 238 | T05-174   | brain       | 6  | q14.1        | deletion            |
| 239 |           |             | 7  | q31.1        | duplication         |
| 240 |           |             | 9  | p22.2        | duplication         |
| 241 |           |             | 13 | q14.11       | duplication         |
| 242 |           |             | 19 | q13.42       | duplication         |
| 243 |           |             | 22 | q arm        | CN LOH              |
| 244 |           |             |    |              |                     |
| 245 | T05-188   | brain       | 19 | q13.41       | duplication         |
| 246 |           |             | 22 | q11.23-12.1  | duplication         |
| 247 |           |             |    |              |                     |
| 248 | T-05-24   | brain       | 6  | q27          | duplication         |
| 249 |           |             | 9  | p24.1        | duplication         |
| 250 |           |             | 22 | q arm        | deletion            |
| 251 |           |             | 22 | q11.23       | homozygous deletion |
| 252 |           |             |    |              |                     |
| 253 | T-05-247  | renal       | 2  | q14.3-q21.1  | deletion            |
| 254 |           |             | 2  | q24.1-24.2   | deletion            |
| 255 |           |             | 22 | q11.23       | homozygous deletion |
| 256 |           |             | 22 | q11.23       | deletion            |
| 257 |           |             | 22 | q13.1-13.2   | deletion            |
| 258 |           |             | 22 | q13.31       | deletion            |
| 259 |           |             |    |              |                     |
| 260 | T05-262   | brain       | 4  | q13.1        | homozygous deletion |
| 261 |           |             | 8  | q21.11-END   | CN LOH              |
| 262 |           |             | 13 | q12.11-END   | CN LOH              |
| 263 |           |             | 22 | q arm        | deletion            |
| 264 |           |             |    |              |                     |
| 265 | T05-289   | neck        | 8  | p23.2        | deletion            |
| 266 |           |             | 22 | q11.21-END   | CN LOH              |
| 267 |           |             |    |              |                     |
| 268 | T-05-36   | brain       | 4  | q34.3        | deletion            |
| 269 |           |             | 16 | q23.1        | duplication         |
| 270 |           |             | 22 | q11.23       | deletion            |
| 271 |           |             | 22 | q11.23       | homozygous deletion |
| 272 |           |             |    |              |                     |
| 273 | T-06-07   | brain       | 22 | q11.21       | duplication         |
| 274 |           |             | 22 | q11.21-END   | CN LOH              |
| 275 |           |             |    |              |                     |
| 276 | T-06-231B | spinal cord | 1  | BEGIN-p36.11 | deletion            |
| 277 |           |             | 2  | p24.1        | duplication         |
| 278 |           |             | 2  | p23.1        | duplication         |
| 279 |           |             | 4  | p15.2-14     | deletion            |
| 280 |           |             | 6  | BEGIN-p21.1  | deletion            |
| 281 |           |             | 7  | p13          | deletion            |
| 282 |           |             | 10 | q11.22-22.1  | deletion            |
| 283 |           |             | 15 | q12-21.2     | deletion            |
| 284 |           |             | 17 | q21.2-21.32  | deletion            |
| 285 |           |             | 22 | q11.21-11.22 | deletion            |
| 286 |           |             | 22 | q11.22-11.23 | homozygous deletion |
| 287 |           |             | 22 | q11.23-12.2  | deletion            |
| 288 |           |             |    |              |                     |
| 289 | T-06-243  | brain       | 3  | p25.2        | deletion            |
| 290 |           |             | 3  | q29          | deletion            |
| 291 |           |             | 22 | q11.23       | homozygous deletion |
| 292 |           |             | 22 | q12.2        | deletion            |
| 293 |           |             | 22 | q arm        | CN LOH              |
| 294 |           |             |    |              |                     |
| 295 | T-06-315  | liver       | 1  | q44          | duplication         |
| 296 |           |             | 3  | p21.31       | deletion            |
| 297 |           |             | 3  | p14.2        | deletion            |
| 298 |           |             | 7  | q36-q36.1    | deletion            |
| 299 |           |             | 22 | q11.22-12.2  | deletion            |
| 300 |           |             | 22 | q11.23       | homozygous deletion |
| 301 |           |             |    |              |                     |

Rhabdoid

|     | A        | B        | C  | D            | E                   |
|-----|----------|----------|----|--------------|---------------------|
| 1   | T-number | Location | C  | Arm          | Abnormality         |
| 302 | T06-72   | brain    | 2  | p25.2        | deletion            |
| 303 |          |          | 5  | q15          | deletion            |
| 304 |          |          | 6  | q14.1        | deletion            |
| 305 |          |          | 15 | q11.2        | deletion            |
| 306 |          |          | 15 | q11.2        | duplication         |
| 307 |          |          | 18 | p11.23       | deletion            |
| 308 |          |          | 20 | q13.2        | deletion            |
| 309 |          |          | 22 | q arm        | CN LOH              |
| 310 |          |          |    |              |                     |
| 311 | T07-06   | brain    | 7  | q21.13       | deletion            |
| 312 |          |          | 22 | q arm        | deletion            |
| 313 |          |          |    |              |                     |
| 314 | T-07-153 | liver    | 2  | p22.1        | deletion            |
| 315 |          |          | 5  | q23.1        | deletion            |
| 316 |          |          | 18 | p11.31       | deletion            |
| 317 |          |          | 22 | q11.22-11.23 | deletion            |
| 318 |          |          | 22 | q11.23       | deletion            |
| 319 |          |          | 22 | q13.1        | deletion            |
| 320 |          |          |    |              |                     |
| 321 | T-07-221 | brain    | 5  | p15.31       | deletion            |
| 322 |          |          | 6  | p21.32-21.31 | deletion            |
| 323 |          |          | 6  | q27          | duplication         |
| 324 |          |          | 22 | q11.22-END   | CN LOH              |
| 325 |          |          | 22 | q11.23       | homozygous deletion |
| 326 |          |          |    |              |                     |
| 327 | T07-301  | lymph    | 2  | WHOLE        | duplication         |
| 328 |          |          | 4  | q34.3        | deletion            |
| 329 |          |          | 6  | q12          | deletion            |
| 330 |          |          | 6  | q14.1        | deletion            |
| 331 |          |          | 17 | q12-END      | duplication         |
| 332 |          |          | 18 | q22.1        | deletion            |
| 333 |          |          | 22 | q11.21       | duplication         |
| 334 |          |          | 22 | q arm        | CN LOH              |
| 335 |          |          |    |              |                     |
| 336 | T08-18   | brain    | 5  | p15.2        | deletion            |
| 337 |          |          | 9  | p23          | duplication         |
| 338 |          |          | 14 | WHOLE        | duplication         |
| 339 |          |          | 22 | q arm        | deletion            |
| 340 |          |          |    |              |                     |
| 341 | T-93-94  | brain    | 9  | q21.31       | deletion            |
| 342 |          |          | 10 | p12.31       | homozygous deletion |
| 343 |          |          | 22 | q11.23       | homozygous deletion |
| 344 |          |          | 22 | q arm        | deletion            |
| 345 |          |          |    |              |                     |
| 346 | T-94-133 | brain    | 5  | p15.31       | deletion            |
| 347 |          |          | 6  | p21.33       | deletion            |
| 348 |          |          | 7  | q35-q36.1    | deletion            |
| 349 |          |          | 9  | p23-24.1     | deletion            |
| 350 |          |          | 9  | p23          | deletion            |
| 351 |          |          | 10 | q11.23       | deletion            |
| 352 |          |          | 11 | q11          | homozygous deletion |
| 353 |          |          | 13 | q33.2        | deletion            |
| 354 |          |          | 22 | q11.21-11.22 | deletion            |
| 355 |          |          | 22 | q11.22-11.23 | homozygous deletion |
| 356 |          |          | 22 | q11.23-END   | CN LOH              |
| 357 |          |          | 22 | q12.1        | deletion            |
| 358 |          |          |    |              |                     |
| 359 | T-95-17  | renal    | 2  | p16.3        | deletion            |
| 360 |          |          | 3  | p14.2        | small deletion      |
| 361 |          |          | 3  | q13.31       | homozygous deletion |
| 362 |          |          | 4  | q34.3        | deletion            |
| 363 |          |          | 5  | p14.1        | deletion            |
| 364 |          |          | 10 | q21.3        | deletion            |
| 365 |          |          | 11 | p15.1        | deletion            |
| 366 |          |          | 12 | p13.2        | deletion            |
| 367 |          |          | 12 | q23.3        | duplication         |
| 368 |          |          | 13 | q31.2        | deletion            |
| 369 |          |          | 13 | q34          | duplication         |
| 370 |          |          | 15 | q11.2-12     | deletion            |
| 371 |          |          | 17 | q24.2        | deletion            |
| 372 |          |          | 20 | q12          | deletion            |
| 373 |          |          | 21 | q22.11-22.12 | deletion            |
| 374 |          |          | 21 | q22.12-END   | duplication         |
| 375 |          |          | 22 | q11.1-q12.1  | deletion            |
| 376 |          |          | 22 | q11.23       | homozygous deletion |

Rhabdoid

|     | A        | B        | C  | D         | E           |
|-----|----------|----------|----|-----------|-------------|
| 1   | T-number | Location | C  | Arm       | Abnormality |
| 377 |          |          | 22 | q13.1-END | deletion    |
